# Supplementary material
Source: PubMed Central journal article supplement (PMC4771366)
Supplement: IAI.00917-15_zii999091605so1.pdf [file IAI.00917-15_zii999091605so1.pdf]

Table S1. Primer sequences used to confirm transposon insertion of different STM mutants and to generate plasmid constructs for complementation as well as purification of CyaB

| Gene/Application                         | Primer sequences ( 5' to 3')                                                                                      |
|------------------------------------------|-------------------------------------------------------------------------------------------------------------------|
| <i>cyaB</i> (BB0723)                     | <i>cya</i> BNF: AATTCATTTTCTTTT TAGGTATAAGC<br><i>cya</i> BCR: TTATTTTTTACTTTGATTGCC                              |
| <i>ptsG</i> (BB0645)                     | <i>pts</i> GF: ATGTTAAAGGGTTTTGAACAAGCTC<br><i>pts</i> GR: TCAAGCCTCTAGCAATTCTTCTA                                |
| <i>fruA1</i> (BB0408)                    | <i>fruA</i> -1F: ATTTTTTGAAAAAAGATCTTG<br><i>fruA</i> -1R: TCATTCAGATTCCTTTAATTTT                                 |
| <i>fruA2</i> (BB0629)                    | <i>fruA</i> -2F: ATGCAAATTTATTTTCAAAAAC<br><i>fruA</i> -2R: TTAATCGTTTATATTCTTGTATTCTT                            |
| <i>malX1</i> (BB0116)                    | <i>malX</i> -1F: TTTATTTAAAATAATTA ACTTTTCAAG<br><i>malX</i> -1R: TAATCTTCTTCTAATTCGCTAA                          |
| <i>malX2</i> (BBB029)                    | <i>malX</i> -2F: ATGTCAACATCATCAGCATC<br><i>malX</i> -2R: TTACATAAGCTTGTCGATTTC                                   |
| <i>chbA</i> (BBB05)                      | <i>chb</i> AF: ATGAATAAAAAAATATATAGCATAGA<br><i>chb</i> AR: CTATTTTTTTTATTTCAATTTATT                              |
| <i>chbC</i> (BBB04)                      | <i>chb</i> CF: ATGAATTTTCAAGATTTTATTGAAAC<br><i>chb</i> CR: CTATTCTTTTTCTGCAAAGTAG                                |
| <i>chbB</i> (BBB06)                      | <i>chb</i> BF: ATGCTGGTACAAAGAATTGAA<br><i>chb</i> BR: TTAAACTGAACTTTTATTGTTAAATG                                 |
| <i>hpr</i> (BB0448) <i>hpr</i> F:        | ATGCAAGAAGTAGAAATTGAGAT<br><i>hpr</i> R: TTAAAGCTCTTTTGAAAAA                                                      |
| Detection of complemented plasmid        | PKFSS1NF: CCAATACGCAAACCGCCTCTC<br>PKFSS1NR: TTATTTGCCGACTACCTTGGTG                                               |
| <i>ptsG</i> complementation <sup>a</sup> | BamH1 <i>pts</i> GN: GGGGGATCC CAGACAATGATTTTAATTTT<br>SalI <i>pts</i> GC: GGGGTCGACAGCTATTACTTATTA AAAAATCAAG    |
| <i>cyaB</i> complementation <sup>a</sup> | <i>cya</i> BFBamH1N2:<br>GGGGGATCCATTCATTTTCTTTT TAGGTATAAGC<br><i>cya</i> BRSalI: GGGGTCGACTTATTTTTTACTTTGATTGCC |
| Recombinant CyaB expression <sup>a</sup> | <i>cya</i> BFBamHIN: GGGGGATCCTTTGAAATAGAATCAA AAGCAT<br><i>cya</i> BRSalIC: GGGGTCGACTTATTTTTTACTTTGATTGCC       |

<sup>a</sup> underline indicates restriction site

Table S2. Primer sequences used for qRT-PCR and qPCR analysis

| Gene                  | Primer sequences ( 5' to 3')                                                          |
|-----------------------|---------------------------------------------------------------------------------------|
| <i>rpoS</i>           | rpoSF:CAGCAGCTCTTATTAATC<br>rpoSR:CACGAAGAAGAAATCAAA                                  |
| <i>chbC</i>           | chbCF:CTACCTATAGCCTTTAGA<br>chbCR:TGCTCTTCTTAATCCTATA                                 |
| <i>hpr</i>            | BB_0448F: GCACGAAGAATGTTTATTTG<br>BB_0448R: GTACCAATGTTATTATTGC                       |
| <i>vlsE</i>           | BB_F0041vlsE1F: GCGATATAAGTAGTACGA<br>BB_F0041vlsE1R: CTGTCTTTACAGCTTTTAC             |
| BB_0844 B             | BB0844F: TCCACTATTTAATTGAGTA<br>BB0844R: GAGAGAAATTAAGAATAAGA                         |
| <i>dbpB</i>           | BBA25F: AAGCCTATTATTCCAACG<br>BBA25R: GGACTAGCCTTAAGAGAA                              |
| <i>dbpA</i>           | BBA 24F: TCCAGTTTCTTTGAGTTTA<br>BBA 24R: CGCTAAAGACATTACAGA                           |
| <i>ospC</i>           | BB_B19F: CTTGGTAAAGAAGGTGTTA<br>BB_B20R: GCTCTTAACTGAATTAGC                           |
| <i>flaB</i>           | BB_0147flaBF: GCAGATTGTGTTAAAATACTA<br>BB_0147flaBR: TCCTGTTAATGTTACAATA              |
| <i>manA</i>           | BB407manAF: TGACCAACTCTTAACATC<br>BB407manAR: CATGCATATCTTAAGGGA                      |
| <i>fruA1</i>          | BB408fruA1F: CTCTCTTACCTTCAAATC<br>BB0408fruA1R: CAAGGATCTATTGGTATTG                  |
| <i>osm28</i>          | BBA74osm28F: TGCAGATTCTAACAATGC<br>BBA74osm28R: CGGTTACCTTGTTAATAGTA                  |
| <i>rpoN</i>           | BB_0450F:GATCGTAAGGGTTTATTATATG<br>BB_0450R: CTGCAATTAAGAATTCAAAGA                    |
| <i>plzA</i>           | BB0733plzAF: CTTCGCAATACTATTGAGA<br>BB0733plzAF: GCACTACTCTTAGAATCTG                  |
| <i>enolase</i>        | eno-BB0337F-RT: GCTTGAACCTTGATGGCACCCCTAC<br>eno-BB0337R-RT: GTACGCTCCAAGATATTGATAAGG |
| <i>flaB</i> (qPCR)    | De FlaBF-GGAGCAAACCAAGATGAAGC<br>De FlaBR-AGCTCCCTCACCAGAGAAAAG                       |
| $\beta$ -actin (qPCR) | JS b-Actin-F : ACGCAGAGGGAAATCGTGCGTGAC<br>JS b-Actin-R : ACGCGGGAGGAAGAGGATGCGGCAGTG |

## Supplemental Figure Legends

**Fig. S1.** PCR assay to verify the insertion site and detect the presence of co-isolated clones in different PEP-PTS and *cyaB* transposon mutants generated in a prior study (1). Primers (Table S1) were designed that flanked the previously determined insertion site, and each set was used for PCR amplification from the 5A18NP1 parental strain (A) and the transposon mutant (B). Presence of the transposon insertion resulted in an increase in size of 1797 bp, whereas a band the same size as that found with 5A18NP1 indicated in the presence of co-isolated clones with different insertion sites. White arrows indicate contamination of the mutant clone with other transposon mutant(s) that have insertions at other sites. Blue arrows indicate mutant that the isolate did not contain a transposon insertion at the expected site.

**Fig. S2.** *B. burgdorferi* burdens in skin and mouse tissues of different PEP-PTS mutants. *flaB* copy numbers were detected by qPCR, representing the number of *B. burgdorferi* genomes.  $\beta$ -actin copy numbers were also determined in these tissues to normalize the *flaB* copy to the host tissue DNA. Each data point in the graph represents the number of copies of *Bb* genomes per  $10^6$  copies of  $\beta$ -actin. The geometric mean  $\pm$  SEM of the three biological replicates are shown. The Student's t-test was not significant ( $p > 0.05$ ) for both skin and heart samples when the data for individual mutants were compared with WT.

**Fig. S3.** Parental 5A18NP1, *ptsG* (BB0645) and *fruA2* (BB0629) (T11P02A09) mutants of *B. burgdorferi* showed similar growth kinetics in BSKII and BSK basal medium containing low levels of glucose (BSK-Lite). Midlog cultures of each strain were inoculated into 6 ml of fresh BSKII medium and BSK-Lite ( $10^6$ /ml) in triplicate, and bacteria were counted each day for 9 days using dark-field microscopy. To remove residual glucose in the BSK-Lite medium studies, the starter cultures for each strain were centrifuged and re-suspended into fresh BSK-Lite medium prior to inoculation. Each data point in the graph indicates the mean  $\pm$  S.E. of three biological replicates. One-way ANOVA analysis (Kruskal-Wallis test) showed that the growth of the three strains was not significantly different ( $p > 0.05$ ) from one another in either medium condition.

**Fig. S4.** PCR assay to determine shuttle vector of *ptsG* complemented strain (*ptsG*:: PKFSS-1-*ptsG*) in BSKII medium after 5 passages of growth in the presence and absence of antibiotic selection. Lane A: each passage without streptomycin; Lane B: each passage with streptomycin;

shuttle vector possesses a streptomycin cassette. *ptsG* complemented strain lost the shuttle plasmid after 4 and 5 passages of growth in the absence of streptomycin whereas the same strain retained the shuttle plasmid when cultured in the presence of streptomycin.

**Fig. S5.** Reverse transcriptase (RT) PCR to identify the transcripts of wild type (WT), *cyaB* mutants and complemented strains of *B. burgdorferi*. Results showed that WT and *cyaB* complemented strains produced *cyaB* transcript whereas none of the *cyaB* mutant, transposon insertion either in the 5'(*cyaBN*) or 3' site (*cyaBC*), does not. Lanes: 1, DNA ladder; 2, WT-with RT; 3, WT-without RT; 4, *cyaBN*-with RT; 5, *cyaBN*-without RT; 6, *cyaBC*-with RT; 7, *cyaBC*-without RT; 8, *cyaB* complemented-with RT; 9, *cyaB* complemented-without RT.

Fig. S1

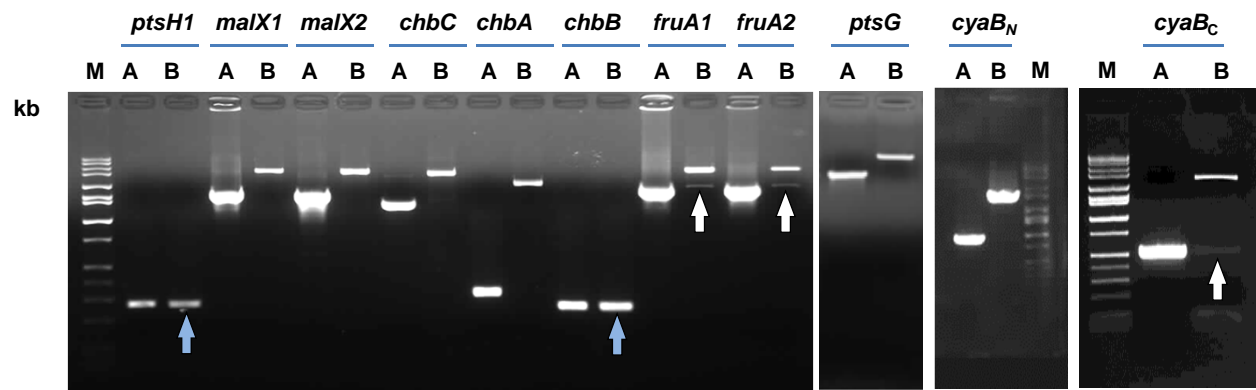

Fig. S2

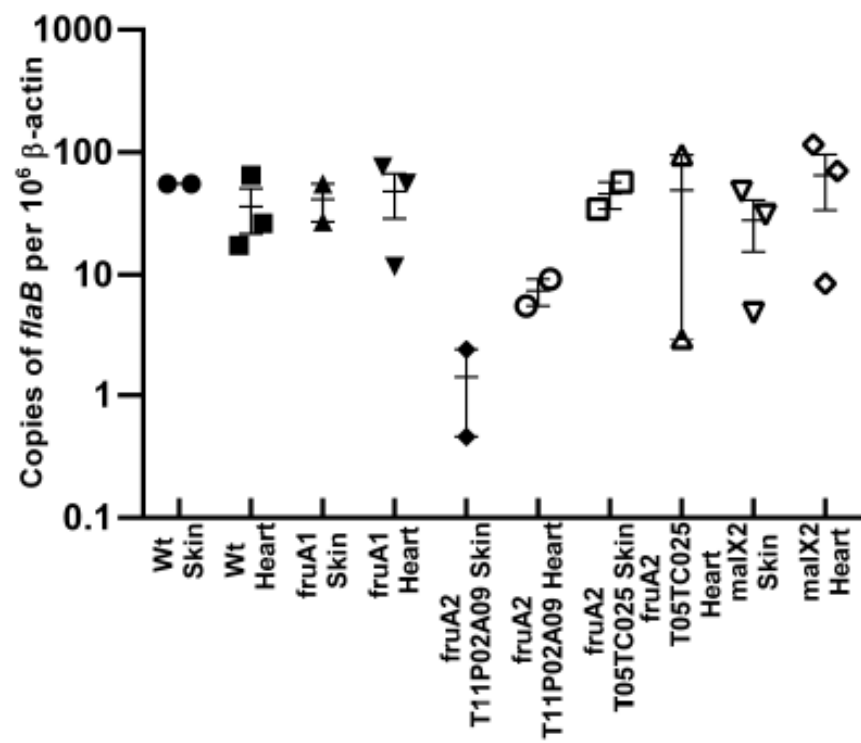

Fig. S3

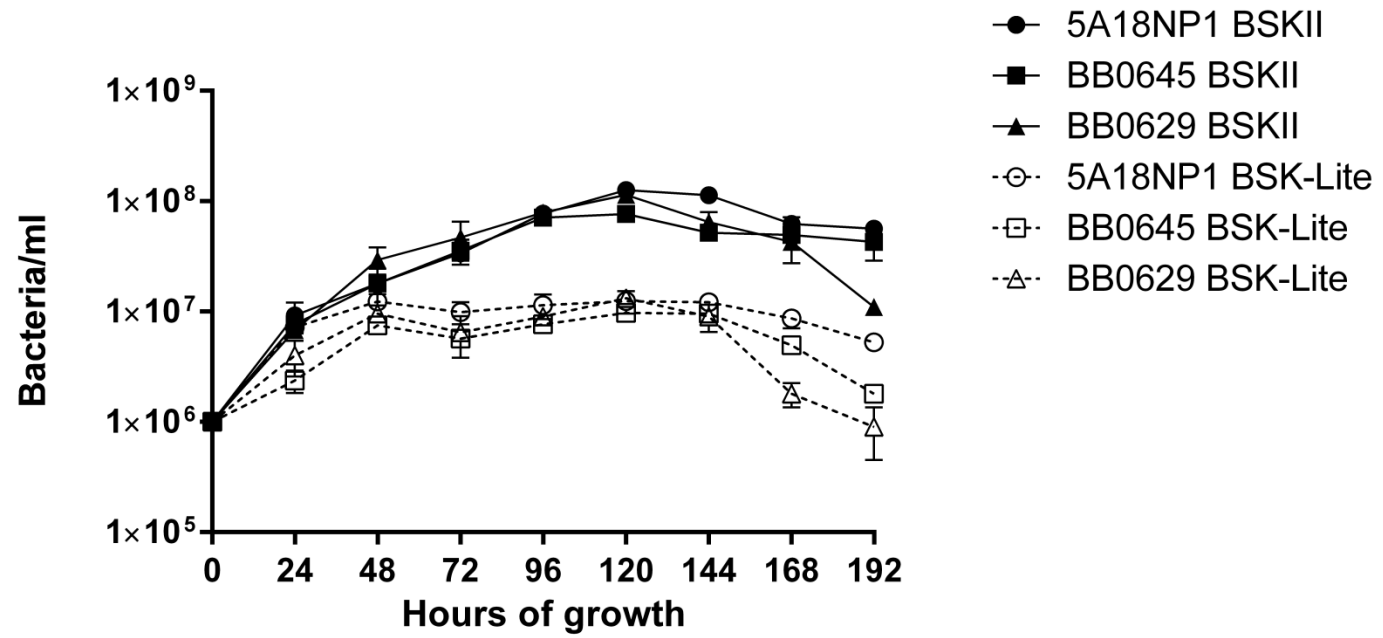

Fig.S4

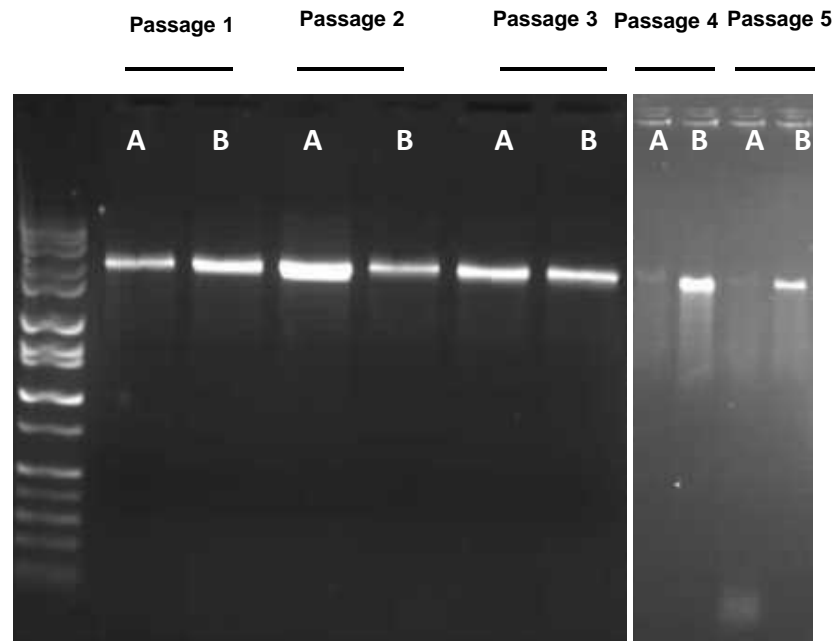



Fig. S5

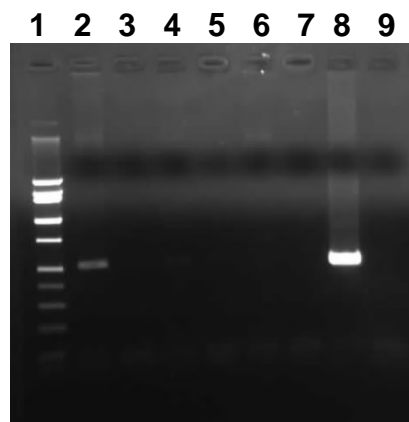

## Reference:

1. **Lin T, Gao L, Zhang C, Odeh E, Jacobs MB, Coutte L, Chaconas G, Philipp MT, Norris SJ.** 2013. Analysis of an ordered, comprehensive STM mutant library in infectious *Borrelia burgdorferi*: insights into the genes required for mouse infectivity. PLoS One **7**:e47532.
